# Supplementary material for: Electrical response of polymer functionalized ultrafine inorganic particles under frequency conditions: an in situ approach
Source: Royal Society of Chemistry journal article supplement (doi:10.1039/d2ma00409g), 2022-01-01
Supplement: d2ma00409g1.pdf [file d2ma00409g1.pdf]

## Supplementary Information

Capacitance and electric field-induced polarization behaviour of polymer functionalized palladium iodide nanoparticles

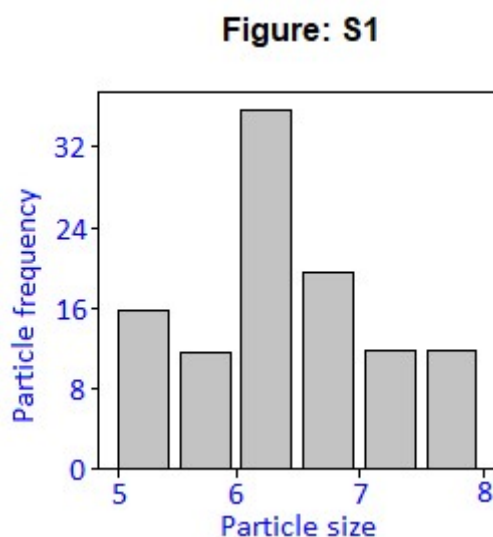

**Figure S1:** Particle size as a function of particle frequency histogram of the palladium iodide nanoparticles

**Table S1:** Fitting parameters ( $R_0$ ,  $R_1$ ,  $R_2$ ,  $Q_1$ ,  $Q_2$ ,  $\alpha_1$  and  $\alpha_2$ ) extracted from the equivalent electrical circuits (figure 4, A and B, in-set) for the POT, PIOT-5 and PIOT based device under ambient temperature (30°C).

| Device | $R_0(\Omega)$ | $Q_1$ (nF) | $\alpha_1$ | $R_1$ ( $\Omega$ ) | $Q_2$ (nF) | $R_2$ ( $\Omega$ ) | $\alpha_2$ |
|--------|---------------|------------|------------|--------------------|------------|--------------------|------------|
| POT    | 3.59          | 0.170      | 0.93       | ---                | 0.57       | 82.14              | 0.98       |
| PIOT-5 | 16.56         | 0.77       | 0.67       | ---                | 0.91       | 122.1              | 0.94       |
| PIOT   | 1.73          | 0.89       | 0.75       | 85.90              | 0.97       | 110.6              | 0.97       |

Complex dielectric constant ( $\epsilon^*$ ) within the model of modified Cole-Cole relation, represented by using the following equation:

$$\epsilon^* = \epsilon_\infty + \frac{(\epsilon_s - \epsilon_\infty)}{1 + i(\omega\tau)^{1-\alpha}} \quad (S1)$$

Where,  $\epsilon_s$  is the static part of the dielectric constant,  $\epsilon_\infty$  is dielectric constant at infinite high frequency. The parameter  $\alpha$  was related to the width of the relaxation time distribution and ' $\tau$ ' is the relaxation time.

Separating the real ( $\epsilon'$ ) and imaginary ( $\epsilon''$ ) part of the dielectric constant from the above equation:

$$\epsilon' = \epsilon_{\infty} + \frac{(\epsilon_s - \epsilon_{\infty})\{1 + (\omega\tau)^{1-\alpha}\sin\left(\frac{\alpha\pi}{2}\right)\}}{1 + 2(\omega\tau)^{1-\alpha}\sin\left(\frac{\alpha\pi}{2}\right) + (\omega\tau)^{2n}} \quad (\text{S2})$$

$$\epsilon'' = \epsilon_{\infty} + \frac{(\epsilon_s - \epsilon_{\infty})\{(\omega\tau)^{1-\alpha}\cos\left(\frac{\alpha\pi}{2}\right)\}}{1 + 2(\omega\tau)^{1-\alpha}\sin\left(\frac{\alpha\pi}{2}\right) + (\omega\tau)^{2n}} \quad (\text{S3})$$

Where,  $n = 1-\alpha$ , and  $\alpha$  represents the tilt angle ( $\alpha\pi/2$ ) of the semicircular arc. Larger the value of  $\alpha$ , means the broader distribution of relaxation times.<sup>R1</sup>

For an ideal Debye model,  $n = 1$ , ( $\alpha = 0$ ) and for a non-Debye condition  $0 \leq \alpha \leq 1$  [1]. The extracted ' $\alpha$ ' parameter are 0.10, 0.11 and 0.13 for POT, PIOT-5 and PIOT, respectively.

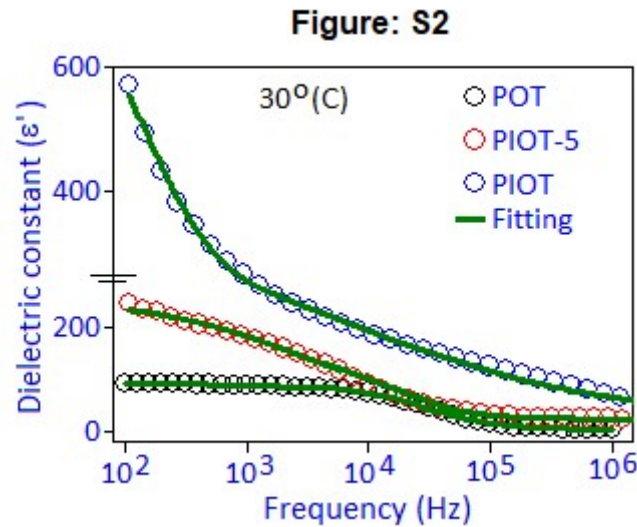

**Figure S2:** The dielectric constant ( $\epsilon'$ ) for POT, PIOT-5 and PIOT under ambient temperature (30 °C). The curves are fitted according to the modified Cole-Cole equation S2 (green colour line).

**Table S2:** Fitting parameters,  $\alpha_1$ ,  $\alpha_2$  and  $\alpha_3$ , extracted from SCLC model, for the three different regions (I, II and III) for POT, PIOT-5 and PIOT based devices, respectively.

| Device | $\alpha_1$ | $\alpha_2$  | $\alpha_3$   |
|--------|------------|-------------|--------------|
|        | Region (I) | Region (II) | Region (III) |
| POT    | 1.5        | 2.2         | 1.2          |
| PIOT-5 | 1.6        | 3.6         | 1.4          |
| PIOT   | 2.2        | 4.8         | 1.8          |

**Figure: S3**

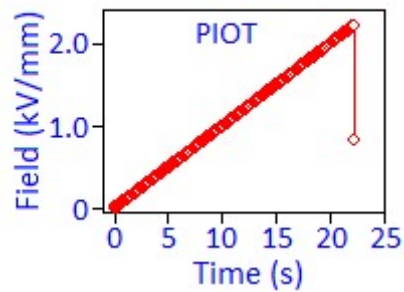

**Figure S3:** Electrical breakdown strength (kV/mm) with respect to time (s) for PIOT based device.

### References:

R1. G. Govinda Raju, Dielectric loss and relaxation-I from: Dielectrics in electric fields, CRC press, London, UK, second edition, 2016.
